# Supplementary material for: Molecular characterization and clinical relevance of m6A regulators across 33 cancer types
Source: Mol Cancer. 2019 Sep 14;18:137. doi: 10.1186/s12943-019-1066-3 (PMC6744659; doi:10.1186/s12943-019-1066-3)
Supplement: Supplementary file 1 — Additional file 1: Table S1. The 33 cancer types in TCGA pancancer project. Table S2. The mutation frequency of m6A regulators across 33 cancer types. Table S3. The CNV amplification frequency of m6A regulators across 33 cancer types. Table S4. The CNV deletion frequency of m6A regulators across 33 cancer types. Table S5. The correlation of m6A regulations and cancer pathways. Table S6. Literature curation of the function for m6A regulators. (XLSX 62 kb) [file 12943_2019_1066_MOESM1_ESM.xlsx]

## Sheet: Table S1
Table S1. The 33 cancer types in TCGA pancancer project.
Number	Cancers	Abbr	Mutation	RNA_Seq_normal	RNA_Seq_cancer	CNV
1	Kidney Renal Clear Cell Carcinoma	KIRC	370	72	539	531
2	Kidney Renal Papillary Cell Carcinoma	KIRP	282	32	289	291
3	Kidney Chromophobe	KICH	66	24	65	69
4	Brain Lower Grade Glioma	LGG	526	0	529	516
5	Glioblastoma Multiforme	GBM	403	5	169	580
6	Breast Invasive Carcinoma	BRCA	1026	113	1109	1083
7	Lung Squamous Cell Carcinoma	LUSC	485	49	502	504
8	Lung Adenocarcinoma	LUAD	569	59	535	519
9	Rectum Adenocarcinoma	READ	151	10	167	168
10	Colon Adenocarcinoma	COAD	408	41	480	454
11	Uterine Carcinosarcoma	UCS	57	0	56	59
12	Uterine Corpus Endometrial Carcinoma	UCEC	531	35	552	542
13	Ovarian Serous Cystadenocarcinoma	OV	412	0	379	582
14	Head and Neck Squamous Carcinoma	HNSC	509	44	502	525
15	Thyroid Carcinoma	THCA	500	58	510	502
16	Prostate Adenocarcinoma	PRAD	498	52	499	495
17	Stomach Adenocarcinoma	STAD	439	32	375	444
18	Skin Cutaneous Melanoma	SKCM	468	1	471	370
19	Bladder Urothelial Carcinoma	BLCA	411	19	414	411
20	Liver Hepatocellular Carcinoma	LIHC	365	50	374	373
21	Cervical Squamous Cell Carcinoma and Endocervical Adenocarcinoma	CESC	291	3	306	298
22	Adrenocortical Carcinoma	ACC	92	0	79	93
23	Pheochromocytoma and Paraganglioma	PCPG	184	3	183	165
24	Sarcoma	SARC	239	2	263	260
25	Acute Myeloid Leukemia	LAML	141	0	151	194
26	Pancreatic Adenocarcinoma	PAAD	178	4	178	187
27	Esophageal Carcinoma	ESCA	185	11	162	187
28	Testicular Germ Cell Tumors	TGCT	151	0	156	153
29	Thymoma	THYM	123	2	119	126
30	Mesothelioma	MESO	82	0	86	90
31	Uveal Melanoma	UVM	80	0	80	83
32	Lymphoid Neoplasm Diffuse Large B-cell Lymphoma	DLBC	37	0	48	51
33	Cholangiocarcinoma	CHOL	36	9	36	39
In total			10295	730	10363	10944

## Sheet: Table S2
Table S2. The mutation frequency of m6A regulators across 33 cancer types.
	KIRC	KIRP	KICH	LGG	GBM	BRCA	LUSC	LUAD	READ	COAD	UCS	UCEC	OV	HNSC	THCA	PRAD	STAD	SKCM	BLCA	LIHC	CESC	ACC	PCPG	SARC	LAML	PAAD	ESCA	TGCT	THYM	MESO	UVM	DLBC	CHOL
YTHDC1	0.00810811	0.0177305	0.0151515	0.00760456	0.00744417	0.00682261	0.014433	0.0210896	0.0331126	0.0441176	0	0.109228	0.00728155	0.0117878	0.002	0.00401606	0.0341686	0.0576923	0.0218978	0.0109589	0.0171821	0	0.00543478	0.0125523	0.0070922	0.00561798	0.00540541	0	0	0	0	0	0
IGF2BP1	0.0027027	0.0070922	0	0.00760456	0.0198511	0.00877193	0.0371134	0.0404218	0.0198675	0.0441176	0.0175439	0.13371	0.00485437	0.00982318	0	0.0060241	0.0273349	0.100427	0.0243309	0.00547945	0.0343643	0.0217391	0	0.0292887	0	0.00561798	0.0324324	0	0.00813008	0	0	0	0
IGF2BP2	0.0027027	0.0106383	0	0.00380228	0.00248139	0.0146199	0.014433	0.0246046	0.0198675	0.0220588	0	0.101695	0	0.00589391	0	0.00200803	0.0318907	0.0235043	0.0194647	0.00273973	0.0412371	0	0	0.0292887	0	0.011236	0.0162162	0.00662252	0.0162602	0	0	0	0.0555556
IGF2BP3	0.0027027	0.0070922	0	0.00570342	0.0148883	0.00682261	0.0206186	0.026362	0.013245	0.0318627	0.0350877	0.0677966	0.0121359	0.0117878	0	0.00200803	0.0296128	0.0384615	0.0291971	0.0136986	0.0274914	0	0	0.0083682	0.0070922	0.011236	0.0108108	0	0	0	0	0	0
YTHDF1	0.00810811	0.0070922	0	0.00380228	0.00992556	0.0116959	0.0164948	0.0140598	0.0198675	0.0269608	0.0175439	0.0640301	0.0145631	0.00982318	0	0.00401606	0.0432802	0.042735	0.0121655	0.0109589	0.0171821	0.0108696	0	0.0041841	0	0.011236	0.0108108	0	0	0	0	0	0
YTHDF3	0.00540541	0.0035461	0	0	0.00496278	0.0107212	0.0123711	0.00878735	0.0264901	0.0318627	0.0175439	0.0960452	0.00728155	0.0157171	0	0.00200803	0.0205011	0.0320513	0.00973236	0.0109589	0.024055	0.0217391	0	0.0041841	0	0.00561798	0.027027	0.00662252	0.00813008	0	0	0	0
YTHDC2	0.0216216	0.0070922	0.0151515	0.00380228	0.00496278	0.00487329	0.028866	0.026362	0.0198675	0.0710784	0.0350877	0.0960452	0.00485437	0.0196464	0	0.0060241	0.0318907	0.0619658	0.0389294	0.0136986	0.0378007	0.0108696	0	0.0083682	0.0141844	0.00561798	0.0162162	0	0	0.0121951	0	0	0
HNRNPA2B1	0.0027027	0.0141844	0.0151515	0.00190114	0.00744417	0.0107212	0.0123711	0.0158172	0.00662252	0.0171569	0.0175439	0.0734463	0.00242718	0.0137525	0.002	0	0.0159453	0.0320513	0.0486618	0.0164384	0.0137457	0	0	0.0083682	0	0	0.0378378	0	0.00813008	0	0	0	0.0277778
YTHDF2	0.0027027	0.0070922	0	0	0.0124069	0.00682261	0.014433	0.0105448	0.0331126	0.0392157	0	0.0564972	0.00242718	0.00982318	0	0.00401606	0.0318907	0.0213675	0.0291971	0.00273973	0.0137457	0.0108696	0	0.0041841	0	0	0.0108108	0	0	0	0	0.0540541	0
HNRNPC	0.00540541	0.0070922	0	0.00570342	0.00248139	0.00584795	0.0164948	0.0123023	0.00662252	0.0245098	0	0.0583804	0	0.00196464	0.002	0	0.0136674	0.00854701	0.00729927	0.0164384	0.0137457	0	0	0	0	0.011236	0.00540541	0	0	0	0	0	0
RBMX	0	0.0035461	0	0.00570342	0.00248139	0.00584795	0.0268041	0.0158172	0.0397351	0.0220588	0.0350877	0.105461	0.00970874	0.00392927	0	0	0.0182232	0.0277778	0.00973236	0.00547945	0.0137457	0	0	0	0.0070922	0.00561798	0.00540541	0	0	0	0	0	0.0277778
METTL3	0.00540541	0.0070922	0	0.0095057	0.00248139	0.00292398	0.00412371	0.00878735	0.0198675	0.0269608	0	0.039548	0.00728155	0.0157171	0	0.00401606	0.00683371	0.0235043	0.0462287	0	0.0171821	0	0	0	0	0.00561798	0.00540541	0	0	0	0	0	0
METTL14	0.00540541	0.0070922	0	0.00380228	0.00496278	0.00389864	0.00618557	0.0123023	0.0198675	0.00980392	0.0175439	0.0508475	0.00485437	0.00785855	0.004	0.00401606	0.0113895	0.017094	0.0145985	0.00273973	0.0103093	0.0108696	0	0	0.0070922	0.00561798	0.00540541	0	0.0162602	0	0	0.027027	0
WTAP	0.00810811	0.0035461	0	0.00380228	0	0.00974659	0.0103093	0.0158172	0.00662252	0.0392157	0.0175439	0.0809793	0.00485437	0.0157171	0.002	0.00200803	0.0159453	0.025641	0.0243309	0.00547945	0.0171821	0.0217391	0	0.0125523	0.0070922	0.0168539	0.0216216	0	0	0.0121951	0	0	0
VIRMA	0.00540541	0.0106383	0.030303	0.0095057	0.0124069	0.0165692	0.0453608	0.0492091	0.0463576	0.0563725	0.0350877	0.103578	0.00728155	0.0314342	0.002	0.00803213	0.0592255	0.102564	0.0656934	0.0164384	0.0343643	0.0108696	0	0.0209205	0	0.011236	0.0216216	0	0	0	0	0	0.0277778
RBM15	0.00540541	0.0141844	0.0151515	0.00380228	0.00992556	0.00682261	0.0247423	0.0281195	0.0463576	0.0563725	0	0.0621469	0.0145631	0.0157171	0.002	0.00401606	0.0455581	0.034188	0.0437956	0.00273973	0.0309278	0.0108696	0	0.0083682	0.0070922	0.011236	0.027027	0	0.00813008	0	0	0	0
RBM15B	0	0.0248227	0.0151515	0.00190114	0.00744417	0.00974659	0.014433	0.0123023	0.0331126	0.0661765	0	0.0922787	0.00970874	0.0117878	0.002	0.00200803	0.0364465	0.034188	0.0121655	0.00547945	0.00687285	0.0217391	0	0.0125523	0	0	0.00540541	0.013245	0	0	0	0.027027	0
ZC3H13	0.0135135	0.0141844	0	0.00760456	0.0124069	0.0146199	0.028866	0.0527241	0.0529801	0.0857843	0.0350877	0.126177	0.0169903	0.0137525	0.012	0.0140562	0.0865604	0.0641026	0.0437956	0.0136986	0.0343643	0.0217391	0	0.0083682	0.0212766	0.00561798	0.0486486	0	0.00813008	0	0.0125	0.027027	0
FTO	0.00540541	0	0.0151515	0.00190114	0.00496278	0.00487329	0.0268041	0.0140598	0.00662252	0.0392157	0	0.0508475	0.0121359	0.00982318	0.002	0.00200803	0.0159453	0.017094	0.0194647	0.0164384	0.0103093	0.0108696	0	0	0	0.00561798	0.0162162	0	0	0	0	0	0
ALKBH5	0.00540541	0.0106383	0	0.00190114	0.00496278	0.00584795	0.00412371	0.0123023	0	0.0245098	0	0.0433145	0.00242718	0.00785855	0	0.00200803	0.0113895	0.00213675	0.0170316	0.00547945	0.0103093	0	0	0	0.0070922	0.00561798	0.00540541	0	0	0	0	0	0

## Sheet: Table S3
Table S3. The CNV amplification frequency of m6A regulators across 33 cancer types.													Table S3. The CNV amplification frequency of m6A regulators across 33 cancer types.
	KIRC	KIRP	KICH	LGG	GBM	BRCA	LUSC	LUAD	READ	COAD	UCS	UCEC	OV	HNSC	THCA	PRAD	STAD	SKCM	BLCA	LIHC	CESC	ACC	PCPG	SARC	LAML	PAAD	ESCA	TGCT	THYM	MESO	UVM	DLBC	CHOL
ALKBH5	0.0492424	0.590278	0	0.0350877	0.0831889	0.0842593	0.123752	0.145349	0.0181818	0.0332594	0.196429	0.0519481	0.0328152	0.1341	0.0340681	0.0386179	0.0544218	0.117166	0.127451	0.102703	0.0644068	0.1	0.00617284	0.404669	0	0.0652174	0.146739	0.28	0.0243902	0.0574713	0.1	0.0416667	0.111111
FTO	0.185606	0.524306	0.318182	0.0350877	0.0658579	0.14537	0.185629	0.205426	0.260606	0.241685	0.107143	0.0371058	0.0794473	0.214559	0.0260521	0.0243902	0.111111	0.114441	0.178922	0.0567568	0.122034	0.555556	0.037037	0.0700389	0.0052356	0.125	0.23913	0.113333	0.0162602	0.16092	0.0125	0.145833	0.138889
ZC3H13	0.0397727	0.100694	0.030303	0.00779727	0.0121317	0.0796296	0.0778443	0.0872093	0.709091	0.583149	0.267857	0.0593692	0.115717	0.109195	0.01002	0.0142276	0.378685	0.250681	0.171569	0.0351351	0.0677966	0.0777778	0.0617284	0.0272374	0.0314136	0.163043	0.244565	0	0.00813008	0.0344828	0.075	0.125	0.0833333
RBM15B	0.0113636	0.25	0.0909091	0.0175439	0.0935875	0.0824074	0.00598802	0.0620155	0.151515	0.0820399	0.125	0.0927644	0.174439	0.0172414	0.00601202	0.0752033	0.0566893	0.174387	0.237745	0.1	0.0949153	0.122222	0.0123457	0.171206	0.0052356	0.0271739	0.0597826	0.193333	0	0.091954	0	0.208333	0.0277778
RBM15	0.0378788	0.0208333	0.0151515	0.0350877	0.147314	0.160185	0.115768	0.228682	0.0424242	0.037694	0.339286	0.0871985	0.29361	0.0766284	0.00601202	0.0162602	0.120181	0.223433	0.198529	0.143243	0.250847	0.0444444	0	0.217899	0.0104712	0.0706522	0.184783	0.3	0.0325203	0.0689655	0.025	0	0.277778
VIRMA	0.128788	0.09375	0.287879	0.155945	0.107452	0.606481	0.592814	0.54845	0.624242	0.547672	0.660714	0.32282	0.587219	0.659004	0.0140281	0.315041	0.614512	0.479564	0.602941	0.594595	0.355932	0.433333	0.0802469	0.33463	0.120419	0.320652	0.630435	0.78	0.0894309	0.172414	0.75	0.166667	0.361111
WTAP	0.0151515	0.0208333	0.0151515	0.0136452	0.0398614	0.126852	0.193613	0.0813953	0.2	0.157428	0.446429	0.118738	0.124352	0.122605	0.00400802	0.00813008	0.163265	0.0626703	0.0857843	0.110811	0.0745763	0.188889	0.0432099	0.233463	0.0052356	0.0217391	0.195652	0.146667	0	0.0229885	0.0875	0.0833333	0.0555556
METTL14	0.0227273	0.0381944	0.348485	0.0116959	0.0519931	0.0981481	0.0558882	0.0910853	0.0424242	0.037694	0.0535714	0.0166976	0.0690846	0.091954	0.012024	0.0325203	0.0453515	0.122616	0.0808824	0.027027	0.0610169	0.411111	0.0246914	0.178988	0.0209424	0.048913	0.11413	0	0.0162602	0.0114943	0.05	0	0.0555556
METTL3	0.0340909	0.0104167	0.318182	0.0233918	0.0433276	0.177778	0.285429	0.327519	0.0545455	0.0820399	0.232143	0.102041	0.236615	0.289272	0.0220441	0.0162602	0.117914	0.117166	0.198529	0.108108	0.159322	0.311111	0.0246914	0.29572	0.0104712	0.163043	0.282609	0.34	0.105691	0.0229885	0.0375	0.0416667	0.0277778
RBMX	0.0530303	0.319444	0.136364	0.0896686	0.0450607	0.162037	0.219561	0.261628	0.218182	0.192905	0.196429	0.141002	0.336788	0.247126	0.0160321	0.0325203	0.188209	0.144414	0.156863	0.2	0.20339	0.488889	0.0308642	0.0894942	0.0104712	0.0978261	0.336957	0.16	0.0569106	0.103448	0.1125	0.104167	0.0277778
HNRNPC	0.0359848	0.0138889	0.318182	0.0272904	0.0450607	0.181481	0.285429	0.321705	0.0545455	0.0820399	0.25	0.113173	0.248705	0.291188	0.0220441	0.0162602	0.122449	0.119891	0.198529	0.110811	0.159322	0.3	0.0246914	0.287938	0.0157068	0.168478	0.277174	0.346667	0.105691	0.0229885	0.0375	0.0416667	0.0277778
YTHDF2	0.0170455	0	0.0151515	0.0272904	0.149047	0.0712963	0.10978	0.22093	0.0181818	0.0177384	0.357143	0.0779221	0.26943	0.101533	0.00400802	0.0101626	0.0816327	0.226158	0.169118	0.0567568	0.274576	0.0444444	0.0123457	0.303502	0.026178	0.0271739	0.125	0.18	0.00813008	0.0574713	0	0	0
HNRNPA2B1	0.327652	0.59375	0.363636	0.22807	0.79896	0.315741	0.48503	0.53876	0.648485	0.567627	0.410714	0.148423	0.314335	0.369732	0.0360721	0.20935	0.487528	0.561308	0.448529	0.316216	0.149153	0.544444	0.179012	0.357977	0.0104712	0.298913	0.657609	0.833333	0.113821	0.287356	0.1	0.291667	0.222222
YTHDC2	0.535985	0.125	0.136364	0.0155945	0.0779896	0.187037	0.0239521	0.178295	0.0969697	0.0665188	0.107143	0.0296846	0.103627	0.0689655	0.0380762	0.0325203	0.0544218	0.138965	0.0686275	0.310811	0.0813559	0.666667	0.0432099	0.276265	0	0.0869565	0.048913	0.0266667	0.0731707	0.114943	0.0375	0.145833	0.277778
YTHDF3	0.121212	0.0798611	0.272727	0.0955166	0.0953206	0.521296	0.516966	0.478682	0.557576	0.525499	0.625	0.313544	0.495682	0.609195	0.0140281	0.25813	0.560091	0.46594	0.534314	0.513514	0.308475	0.411111	0.0802469	0.307393	0.125654	0.255435	0.559783	0.813333	0.0813008	0.16092	0.625	0.104167	0.277778
YTHDF1	0.227273	0.354167	0.348485	0.0974659	0.388215	0.480556	0.493014	0.47093	0.878788	0.720621	0.803571	0.280148	0.683938	0.383142	0.0240481	0.0833333	0.643991	0.517711	0.556373	0.340541	0.420339	0.577778	0.0617284	0.357977	0.0104712	0.255435	0.630435	0.28	0.0813008	0.149425	0.1125	0.0833333	0.361111
IGF2BP3	0.329545	0.597222	0.363636	0.231969	0.793761	0.327778	0.512974	0.544574	0.642424	0.56541	0.517857	0.150278	0.297064	0.375479	0.0360721	0.215447	0.494331	0.561308	0.446078	0.327027	0.149153	0.533333	0.17284	0.354086	0.0104712	0.288043	0.673913	0.833333	0.113821	0.287356	0.1	0.3125	0.222222
IGF2BP2	0.159091	0.340278	0.0909091	0.0292398	0.169844	0.293519	0.89022	0.275194	0.218182	0.172949	0.607143	0.282004	0.759931	0.718391	0.00400802	0.130081	0.344671	0.201635	0.531863	0.162162	0.752542	0.222222	0	0.206226	0.0052356	0.146739	0.646739	0.32	0.0406504	0.195402	0	0.3125	0.277778
IGF2BP1	0.0643939	0.673611	0	0.042885	0.112652	0.306481	0.373253	0.449612	0.230303	0.21286	0.464286	0.100186	0.174439	0.178161	0.0420842	0.0426829	0.222222	0.26703	0.397059	0.294595	0.19661	0.0777778	0.0555556	0.272374	0.0209424	0.13587	0.320652	0.38	0.0731707	0.275862	0.1125	0.0625	0.222222
YTHDC1	0.0284091	0.0347222	0.348485	0.0155945	0.0467938	0.134259	0.155689	0.135659	0.0545455	0.0421286	0.0892857	0.0296846	0.196891	0.149425	0.01002	0.0284553	0.0725624	0.128065	0.129902	0.0459459	0.0711864	0.411111	0.0308642	0.214008	0.0209424	0.048913	0.173913	0.0666667	0.0162602	0.0229885	0.0375	0	0.0555556

## Sheet: Table S4
Table S4. The CNV deletion frequency of m6A regulators across 33 cancer types.
	KIRC	KIRP	KICH	LGG	GBM	BRCA	LUSC	LUAD	READ	COAD	UCS	UCEC	OV	HNSC	THCA	PRAD	STAD	SKCM	BLCA	LIHC	CESC	ACC	PCPG	SARC	LAML	PAAD	ESCA	TGCT	THYM	MESO	UVM	DLBC	CHOL
ALKBH5	0.0852273	0.0486111	0.757576	0.0272904	0.119584	0.52963	0.576846	0.445736	0.684848	0.536585	0.571429	0.230056	0.849741	0.193487	0.0140281	0.121951	0.380952	0.332425	0.470588	0.432432	0.342373	0.3	0.376543	0.143969	0.0732984	0.413043	0.456522	0.253333	0.097561	0.275862	0.025	0.145833	0.277778
FTO	0.0416667	0.0243056	0.0757576	0.042885	0.159445	0.559259	0.37525	0.277132	0.0909091	0.0554324	0.696429	0.261596	0.663212	0.180077	0.00400802	0.229675	0.281179	0.324251	0.296569	0.397297	0.20339	0.0666667	0.037037	0.533074	0.0209424	0.0652174	0.293478	0.34	0.105691	0.195402	0.2125	0.125	0.194444
ZC3H13	0.153409	0.0833333	0.666667	0.274854	0.410745	0.452778	0.680639	0.550388	0.0484848	0.0421286	0.517857	0.194805	0.625216	0.421456	0.0360721	0.461382	0.106576	0.245232	0.35049	0.481081	0.39661	0.444444	0.0432099	0.661479	0.0052356	0.108696	0.391304	0.766667	0.113821	0.471264	0.0375	0.104167	0.472222
RBM15B	0.880682	0.0902778	0.166667	0.0955166	0.0970537	0.323148	0.870259	0.467054	0.157576	0.159645	0.625	0.137291	0.331606	0.720307	0.00601202	0.0325203	0.340136	0.196185	0.296569	0.175676	0.413559	0.244444	0.388889	0.252918	0.0314136	0.271739	0.679348	0.206667	0.105691	0.517241	0.55	0.125	0.805556
RBM15	0.123106	0.121528	0.80303	0.360624	0.0415945	0.302778	0.443114	0.304264	0.333333	0.274945	0.214286	0.0649351	0.188256	0.229885	0.00801603	0.0894309	0.206349	0.223433	0.151961	0.232432	0.108475	0.344444	0.746914	0.167315	0	0.23913	0.315217	0.14	0.0569106	0.390805	0.25	0.125	0.138889
VIRMA	0.11553	0.03125	0.136364	0.0214425	0.0762565	0.025	0.0718563	0.0717054	0.0363636	0.0288248	0.125	0.0371058	0.124352	0.0249042	0.00801603	0.0203252	0.0385488	0.0626703	0.0490196	0.0432432	0.0610169	0.122222	0.0802469	0.163424	0	0.0652174	0.0706522	0.0266667	0.0162602	0.0574713	0	0.0833333	0.0555556
WTAP	0.285985	0.107639	0.772727	0.155945	0.27383	0.337037	0.261477	0.501938	0.163636	0.119734	0.142857	0.0853432	0.644214	0.168582	0.012024	0.126016	0.206349	0.594005	0.460784	0.375676	0.328814	0.2	0.123457	0.190661	0	0.494565	0.266304	0.166667	0.178862	0.413793	0.2875	0.1875	0.694444
METTL14	0.145833	0.09375	0.0151515	0.208577	0.109185	0.291667	0.608782	0.325581	0.430303	0.310421	0.678571	0.204082	0.678756	0.298851	0.00400802	0.0853659	0.38322	0.26158	0.379902	0.435135	0.338983	0.122222	0.0679012	0.245136	0.0104712	0.157609	0.5	0.733333	0.0325203	0.436782	0.05	0.125	0.472222
METTL3	0.392045	0.173611	0.030303	0.132554	0.298094	0.225926	0.345309	0.195736	0.406061	0.314856	0.482143	0.111317	0.290155	0.141762	0.00200401	0.0731707	0.253968	0.302452	0.286765	0.210811	0.0949153	0.2	0.12963	0.214008	0.0052356	0.103261	0.282609	0.133333	0.0162602	0.425287	0.0125	0.0416667	0.388889
RBMX	0.0965909	0.0972222	0.575758	0.148148	0.180243	0.166667	0.205589	0.0872093	0.139394	0.110865	0.392857	0.135436	0.378238	0.111111	0.00801603	0.0589431	0.0952381	0.250681	0.196078	0.167568	0.183051	0.166667	0.32716	0.501946	0.0314136	0.103261	0.130435	0.193333	0.0325203	0.287356	0.175	0.0833333	0.416667
HNRNPC	0.386364	0.173611	0.030303	0.128655	0.299827	0.225	0.347305	0.203488	0.412121	0.314856	0.464286	0.107607	0.279793	0.137931	0.00200401	0.0731707	0.256236	0.302452	0.284314	0.213514	0.0949153	0.211111	0.12963	0.22179	0.0052356	0.108696	0.288043	0.126667	0.0162602	0.425287	0.0125	0.0416667	0.388889
YTHDF2	0.179924	0.173611	0.80303	0.364522	0.067591	0.392593	0.423154	0.24031	0.448485	0.356984	0.178571	0.131725	0.38342	0.170498	0.00801603	0.0894309	0.256236	0.163488	0.20098	0.378378	0.0949153	0.388889	0.623457	0.140078	0.0052356	0.342391	0.369565	0.173333	0.0650407	0.241379	0.3125	0.125	0.777778
HNRNPA2B1	0.00378788	0.00347222	0.0151515	0.00974659	0.0121317	0.103704	0.129741	0.0581395	0.00606061	0.00443459	0.196429	0.0871985	0.274611	0.0555556	0	0.00609756	0.0362812	0.0572207	0.0514706	0.0432432	0.0847458	0.0666667	0	0.108949	0.0890052	0.0163043	0.0652174	0.0133333	0.0243902	0.0114943	0	0.0625	0.0833333
YTHDC2	0.0151515	0.0381944	0.151515	0.0838207	0.0797227	0.246296	0.772455	0.399225	0.333333	0.286031	0.446429	0.176252	0.556131	0.388889	0	0.136179	0.369615	0.294278	0.482843	0.124324	0.247458	0.0333333	0.0617284	0.159533	0.0837696	0.130435	0.532609	0.673333	0.0162602	0.195402	0.0375	0.0416667	0.111111
YTHDF3	0.138258	0.0347222	0.151515	0.0253411	0.0814558	0.0564815	0.131737	0.104651	0.0606061	0.0310421	0.160714	0.0278293	0.112263	0.0478927	0.00801603	0.0406504	0.0839002	0.0708447	0.0710784	0.0810811	0.0745763	0.133333	0.0740741	0.132296	0	0.0923913	0.103261	0.0266667	0.0162602	0.0689655	0	0.166667	0.138889
YTHDF1	0	0	0.0454545	0.0155945	0.034662	0.0462963	0.125749	0.0852713	0.0121212	0	0.0535714	0.0241187	0.0483592	0.0651341	0	0.0121951	0.0136054	0.0163488	0.0588235	0.0216216	0.0474576	0.0555556	0.0246914	0.11284	0	0.0380435	0.0326087	0.1	0.00813008	0.0344828	0	0.0416667	0.0277778
IGF2BP3	0.00378788	0.00347222	0.0151515	0.00974659	0.0155979	0.10463	0.11976	0.0581395	0.00606061	0.00443459	0.178571	0.096475	0.291883	0.0498084	0.00200401	0.0121951	0.0340136	0.0599455	0.0563725	0.0432432	0.0881356	0.0888889	0	0.120623	0.0890052	0.0163043	0.0434783	0.0133333	0.0162602	0	0	0.0625	0.0833333
IGF2BP2	0.117424	0.0243056	0.136364	0.0545809	0.067591	0.0657407	0.011976	0.255814	0.0666667	0.0709534	0.142857	0.0204082	0.0500864	0.01341	0.00801603	0.0426829	0.0929705	0.155313	0.0245098	0.116216	0.0135593	0.211111	0.580247	0.178988	0.0157068	0.0978261	0.0815217	0.126667	0.0487805	0.103448	0.55	0.0625	0.111111
IGF2BP1	0.0549242	0.00347222	0.757576	0.0311891	0.0779896	0.213889	0.145709	0.0542636	0.151515	0.121951	0.267857	0.150278	0.552677	0.0651341	0.00200401	0.0386179	0.131519	0.152589	0.0784314	0.072973	0.0881356	0.255556	0.111111	0.155642	0.0314136	0.108696	0.119565	0.0666667	0.0325203	0.045977	0.0125	0.0833333	0.0277778
YTHDC1	0.123106	0.0833333	0.0151515	0.187135	0.105719	0.244444	0.469062	0.273256	0.351515	0.281596	0.571429	0.16141	0.414508	0.235632	0.00400802	0.0487805	0.356009	0.228883	0.29902	0.394595	0.291525	0.0888889	0.0740741	0.18677	0.0157068	0.152174	0.423913	0.62	0.0325203	0.390805	0.05	0.125	0.361111

## Sheet: Table S5
Table S5. The correlation of m6A regulations and cancer pathways.
Pathways	Genes	Proportion of cancer types	type
HALLMARK_ADIPOGENESIS_Pos	VIRMA	0.030303	Pos
HALLMARK_ADIPOGENESIS_Pos	YTHDC2	0.030303	Pos
HALLMARK_ADIPOGENESIS_Pos	YTHDF2	0.030303	Pos
HALLMARK_ADIPOGENESIS_Pos	YTHDF3	0.030303	Pos
HALLMARK_ALLOGRAFT_REJECTION_Pos	IGF2BP2	0.0606061	Pos
HALLMARK_ALLOGRAFT_REJECTION_Pos	ZC3H13	0.030303	Pos
HALLMARK_ANDROGEN_RESPONSE_Pos	FTO	0.030303	Pos
HALLMARK_ANDROGEN_RESPONSE_Pos	HNRNPA2B1	0.030303	Pos
HALLMARK_ANDROGEN_RESPONSE_Pos	METTL14	0.181818	Pos
HALLMARK_ANDROGEN_RESPONSE_Pos	VIRMA	0.121212	Pos
HALLMARK_ANDROGEN_RESPONSE_Pos	WTAP	0.030303	Pos
HALLMARK_ANDROGEN_RESPONSE_Pos	YTHDC1	0.0909091	Pos
HALLMARK_ANDROGEN_RESPONSE_Pos	YTHDC2	0.181818	Pos
HALLMARK_ANDROGEN_RESPONSE_Pos	YTHDF3	0.242424	Pos
HALLMARK_ANDROGEN_RESPONSE_Pos	ZC3H13	0.30303	Pos
HALLMARK_ANGIOGENESIS_Pos	FTO	0.0606061	Pos
HALLMARK_ANGIOGENESIS_Pos	IGF2BP2	0.030303	Pos
HALLMARK_APICAL_JUNCTION_Pos	FTO	0.0909091	Pos
HALLMARK_APICAL_JUNCTION_Pos	YTHDC2	0.030303	Pos
HALLMARK_APICAL_JUNCTION_Pos	YTHDF3	0.030303	Pos
HALLMARK_APICAL_JUNCTION_Pos	ZC3H13	0.0606061	Pos
HALLMARK_APICAL_SURFACE_Pos	FTO	0.030303	Pos
HALLMARK_APOPTOSIS_Pos	WTAP	0.0606061	Pos
HALLMARK_APOPTOSIS_Pos	YTHDC2	0.030303	Pos
HALLMARK_APOPTOSIS_Pos	YTHDF3	0.030303	Pos
HALLMARK_APOPTOSIS_Pos	ZC3H13	0.030303	Pos
HALLMARK_BILE_ACID_METABOLISM_Pos	METTL14	0.030303	Pos
HALLMARK_COAGULATION_Pos	IGF2BP2	0.030303	Pos
HALLMARK_COMPLEMENT_Pos	IGF2BP2	0.0606061	Pos
HALLMARK_DNA_REPAIR_Pos	ALKBH5	0.030303	Pos
HALLMARK_DNA_REPAIR_Pos	HNRNPA2B1	0.181818	Pos
HALLMARK_DNA_REPAIR_Pos	HNRNPC	0.333333	Pos
HALLMARK_DNA_REPAIR_Pos	IGF2BP1	0.030303	Pos
HALLMARK_DNA_REPAIR_Pos	RBM15B	0.030303	Pos
HALLMARK_DNA_REPAIR_Pos	RBMX	0.242424	Pos
HALLMARK_DNA_REPAIR_Pos	WTAP	0.030303	Pos
HALLMARK_DNA_REPAIR_Pos	YTHDF2	0.0606061	Pos
HALLMARK_E2F_TARGETS_Pos	HNRNPA2B1	0.393939	Pos
HALLMARK_E2F_TARGETS_Pos	HNRNPC	0.121212	Pos
HALLMARK_E2F_TARGETS_Pos	IGF2BP1	0.030303	Pos
HALLMARK_E2F_TARGETS_Pos	IGF2BP3	0.0606061	Pos
HALLMARK_E2F_TARGETS_Pos	RBM15	0.0606061	Pos
HALLMARK_E2F_TARGETS_Pos	RBM15B	0.030303	Pos
HALLMARK_E2F_TARGETS_Pos	RBMX	0.363636	Pos
HALLMARK_E2F_TARGETS_Pos	VIRMA	0.0909091	Pos
HALLMARK_E2F_TARGETS_Pos	WTAP	0.030303	Pos
HALLMARK_E2F_TARGETS_Pos	YTHDF2	0.030303	Pos
HALLMARK_EPITHELIAL_MESENCHYMAL_TRANSITION_Pos	FTO	0.0909091	Pos
HALLMARK_EPITHELIAL_MESENCHYMAL_TRANSITION_Pos	IGF2BP2	0.0606061	Pos
HALLMARK_ESTROGEN_RESPONSE_EARLY_Pos	YTHDC2	0.030303	Pos
HALLMARK_ESTROGEN_RESPONSE_LATE_Pos	IGF2BP3	0.030303	Pos
HALLMARK_FATTY_ACID_METABOLISM_Pos	HNRNPA2B1	0.030303	Pos
HALLMARK_FATTY_ACID_METABOLISM_Pos	METTL14	0.030303	Pos
HALLMARK_FATTY_ACID_METABOLISM_Pos	VIRMA	0.030303	Pos
HALLMARK_FATTY_ACID_METABOLISM_Pos	YTHDC2	0.030303	Pos
HALLMARK_FATTY_ACID_METABOLISM_Pos	YTHDF3	0.030303	Pos
HALLMARK_G2M_CHECKPOINT_Pos	HNRNPA2B1	0.363636	Pos
HALLMARK_G2M_CHECKPOINT_Pos	HNRNPC	0.0606061	Pos
HALLMARK_G2M_CHECKPOINT_Pos	IGF2BP1	0.030303	Pos
HALLMARK_G2M_CHECKPOINT_Pos	IGF2BP3	0.121212	Pos
HALLMARK_G2M_CHECKPOINT_Pos	RBM15	0.0909091	Pos
HALLMARK_G2M_CHECKPOINT_Pos	RBM15B	0.0909091	Pos
HALLMARK_G2M_CHECKPOINT_Pos	RBMX	0.212121	Pos
HALLMARK_G2M_CHECKPOINT_Pos	VIRMA	0.151515	Pos
HALLMARK_G2M_CHECKPOINT_Pos	WTAP	0.030303	Pos
HALLMARK_G2M_CHECKPOINT_Pos	YTHDC2	0.030303	Pos
HALLMARK_G2M_CHECKPOINT_Pos	YTHDF2	0.030303	Pos
HALLMARK_G2M_CHECKPOINT_Pos	YTHDF3	0.0606061	Pos
HALLMARK_GLYCOLYSIS_Pos	ALKBH5	0.030303	Pos
HALLMARK_GLYCOLYSIS_Pos	IGF2BP2	0.030303	Pos
HALLMARK_GLYCOLYSIS_Pos	IGF2BP3	0.030303	Pos
HALLMARK_GLYCOLYSIS_Pos	RBMX	0.030303	Pos
HALLMARK_HEDGEHOG_SIGNALING_Pos	FTO	0.0909091	Pos
HALLMARK_HEDGEHOG_SIGNALING_Pos	IGF2BP3	0.030303	Pos
HALLMARK_HEDGEHOG_SIGNALING_Pos	RBM15B	0.030303	Pos
HALLMARK_HEDGEHOG_SIGNALING_Pos	YTHDF3	0.030303	Pos
HALLMARK_HEDGEHOG_SIGNALING_Pos	ZC3H13	0.181818	Pos
HALLMARK_HEME_METABOLISM_Pos	FTO	0.0606061	Pos
HALLMARK_HEME_METABOLISM_Pos	VIRMA	0.030303	Pos
HALLMARK_HEME_METABOLISM_Pos	WTAP	0.030303	Pos
HALLMARK_HEME_METABOLISM_Pos	YTHDC1	0.030303	Pos
HALLMARK_HEME_METABOLISM_Pos	YTHDC2	0.030303	Pos
HALLMARK_HEME_METABOLISM_Pos	YTHDF3	0.0909091	Pos
HALLMARK_HEME_METABOLISM_Pos	ZC3H13	0.0606061	Pos
HALLMARK_IL2_STAT5_SIGNALING_Pos	IGF2BP2	0.0606061	Pos
HALLMARK_IL6_JAK_STAT3_SIGNALING_Pos	IGF2BP2	0.0606061	Pos
HALLMARK_INFLAMMATORY_RESPONSE_Pos	IGF2BP2	0.0606061	Pos
HALLMARK_KRAS_SIGNALING_DN_Pos	ALKBH5	0.030303	Pos
HALLMARK_KRAS_SIGNALING_DN_Pos	RBM15B	0.030303	Pos
HALLMARK_KRAS_SIGNALING_UP_Pos	IGF2BP2	0.030303	Pos
HALLMARK_MITOTIC_SPINDLE_Pos	FTO	0.030303	Pos
HALLMARK_MITOTIC_SPINDLE_Pos	HNRNPA2B1	0.0909091	Pos
HALLMARK_MITOTIC_SPINDLE_Pos	IGF2BP3	0.030303	Pos
HALLMARK_MITOTIC_SPINDLE_Pos	METTL14	0.030303	Pos
HALLMARK_MITOTIC_SPINDLE_Pos	RBM15	0.0909091	Pos
HALLMARK_MITOTIC_SPINDLE_Pos	RBM15B	0.030303	Pos
HALLMARK_MITOTIC_SPINDLE_Pos	VIRMA	0.151515	Pos
HALLMARK_MITOTIC_SPINDLE_Pos	YTHDC1	0.121212	Pos
HALLMARK_MITOTIC_SPINDLE_Pos	YTHDC2	0.121212	Pos
HALLMARK_MITOTIC_SPINDLE_Pos	YTHDF3	0.0909091	Pos
HALLMARK_MITOTIC_SPINDLE_Pos	ZC3H13	0.393939	Pos
HALLMARK_MTORC1_SIGNALING_Pos	HNRNPA2B1	0.0606061	Pos
HALLMARK_MTORC1_SIGNALING_Pos	HNRNPC	0.121212	Pos
HALLMARK_MTORC1_SIGNALING_Pos	IGF2BP1	0.030303	Pos
HALLMARK_MTORC1_SIGNALING_Pos	IGF2BP3	0.0909091	Pos
HALLMARK_MTORC1_SIGNALING_Pos	METTL3	0.030303	Pos
HALLMARK_MTORC1_SIGNALING_Pos	RBMX	0.030303	Pos
HALLMARK_MTORC1_SIGNALING_Pos	VIRMA	0.030303	Pos
HALLMARK_MTORC1_SIGNALING_Pos	YTHDC2	0.030303	Pos
HALLMARK_MTORC1_SIGNALING_Pos	YTHDF2	0.030303	Pos
HALLMARK_MTORC1_SIGNALING_Pos	YTHDF3	0.030303	Pos
HALLMARK_MYC_TARGETS_V1_Pos	HNRNPA2B1	0.393939	Pos
HALLMARK_MYC_TARGETS_V1_Pos	HNRNPC	0.484848	Pos
HALLMARK_MYC_TARGETS_V1_Pos	IGF2BP1	0.030303	Pos
HALLMARK_MYC_TARGETS_V1_Pos	IGF2BP3	0.030303	Pos
HALLMARK_MYC_TARGETS_V1_Pos	METTL14	0.030303	Pos
HALLMARK_MYC_TARGETS_V1_Pos	METTL3	0.030303	Pos
HALLMARK_MYC_TARGETS_V1_Pos	RBM15B	0.030303	Pos
HALLMARK_MYC_TARGETS_V1_Pos	RBMX	0.545455	Pos
HALLMARK_MYC_TARGETS_V1_Pos	VIRMA	0.181818	Pos
HALLMARK_MYC_TARGETS_V1_Pos	WTAP	0.030303	Pos
HALLMARK_MYC_TARGETS_V1_Pos	YTHDC1	0.030303	Pos
HALLMARK_MYC_TARGETS_V1_Pos	YTHDC2	0.0606061	Pos
HALLMARK_MYC_TARGETS_V1_Pos	YTHDF2	0.0909091	Pos
HALLMARK_MYC_TARGETS_V1_Pos	YTHDF3	0.030303	Pos
HALLMARK_MYC_TARGETS_V2_Pos	HNRNPA2B1	0.0606061	Pos
HALLMARK_MYC_TARGETS_V2_Pos	HNRNPC	0.212121	Pos
HALLMARK_MYC_TARGETS_V2_Pos	IGF2BP1	0.030303	Pos
HALLMARK_MYC_TARGETS_V2_Pos	RBM15	0.0606061	Pos
HALLMARK_MYC_TARGETS_V2_Pos	RBM15B	0.0606061	Pos
HALLMARK_MYC_TARGETS_V2_Pos	RBMX	0.121212	Pos
HALLMARK_MYC_TARGETS_V2_Pos	YTHDF2	0.0909091	Pos
HALLMARK_MYOGENESIS_Pos	FTO	0.030303	Pos
HALLMARK_NOTCH_SIGNALING_Pos	FTO	0.030303	Pos
HALLMARK_NOTCH_SIGNALING_Pos	YTHDF3	0.030303	Pos
HALLMARK_OXIDATIVE_PHOSPHORYLATION_Pos	ALKBH5	0.030303	Pos
HALLMARK_OXIDATIVE_PHOSPHORYLATION_Pos	HNRNPC	0.151515	Pos
HALLMARK_OXIDATIVE_PHOSPHORYLATION_Pos	VIRMA	0.030303	Pos
HALLMARK_OXIDATIVE_PHOSPHORYLATION_Pos	YTHDC2	0.030303	Pos
HALLMARK_OXIDATIVE_PHOSPHORYLATION_Pos	YTHDF2	0.030303	Pos
HALLMARK_OXIDATIVE_PHOSPHORYLATION_Pos	YTHDF3	0.030303	Pos
HALLMARK_PANCREAS_BETA_CELLS_Pos	FTO	0.030303	Pos
HALLMARK_PANCREAS_BETA_CELLS_Pos	METTL14	0.030303	Pos
HALLMARK_PEROXISOME_Pos	METTL3	0.030303	Pos
HALLMARK_PEROXISOME_Pos	VIRMA	0.030303	Pos
HALLMARK_PEROXISOME_Pos	YTHDC2	0.030303	Pos
HALLMARK_PEROXISOME_Pos	YTHDF2	0.030303	Pos
HALLMARK_PEROXISOME_Pos	YTHDF3	0.030303	Pos
HALLMARK_PI3K_AKT_MTOR_SIGNALING_Pos	FTO	0.030303	Pos
HALLMARK_PI3K_AKT_MTOR_SIGNALING_Pos	HNRNPA2B1	0.030303	Pos
HALLMARK_PI3K_AKT_MTOR_SIGNALING_Pos	IGF2BP3	0.030303	Pos
HALLMARK_PI3K_AKT_MTOR_SIGNALING_Pos	METTL14	0.0606061	Pos
HALLMARK_PI3K_AKT_MTOR_SIGNALING_Pos	METTL3	0.030303	Pos
HALLMARK_PI3K_AKT_MTOR_SIGNALING_Pos	VIRMA	0.0606061	Pos
HALLMARK_PI3K_AKT_MTOR_SIGNALING_Pos	WTAP	0.030303	Pos
HALLMARK_PI3K_AKT_MTOR_SIGNALING_Pos	YTHDC1	0.0606061	Pos
HALLMARK_PI3K_AKT_MTOR_SIGNALING_Pos	YTHDC2	0.0909091	Pos
HALLMARK_PI3K_AKT_MTOR_SIGNALING_Pos	YTHDF3	0.0909091	Pos
HALLMARK_PI3K_AKT_MTOR_SIGNALING_Pos	ZC3H13	0.212121	Pos
HALLMARK_PROTEIN_SECRETION_Pos	FTO	0.151515	Pos
HALLMARK_PROTEIN_SECRETION_Pos	HNRNPA2B1	0.030303	Pos
HALLMARK_PROTEIN_SECRETION_Pos	METTL14	0.333333	Pos
HALLMARK_PROTEIN_SECRETION_Pos	VIRMA	0.212121	Pos
HALLMARK_PROTEIN_SECRETION_Pos	WTAP	0.030303	Pos
HALLMARK_PROTEIN_SECRETION_Pos	YTHDC1	0.0909091	Pos
HALLMARK_PROTEIN_SECRETION_Pos	YTHDC2	0.242424	Pos
HALLMARK_PROTEIN_SECRETION_Pos	YTHDF2	0.030303	Pos
HALLMARK_PROTEIN_SECRETION_Pos	YTHDF3	0.545455	Pos
HALLMARK_PROTEIN_SECRETION_Pos	ZC3H13	0.454545	Pos
HALLMARK_REACTIVE_OXIGEN_SPECIES_PATHWAY_Pos	YTHDF3	0.030303	Pos
HALLMARK_SPERMATOGENESIS_Pos	HNRNPA2B1	0.0909091	Pos
HALLMARK_SPERMATOGENESIS_Pos	HNRNPC	0.0909091	Pos
HALLMARK_SPERMATOGENESIS_Pos	IGF2BP1	0.030303	Pos
HALLMARK_SPERMATOGENESIS_Pos	RBM15	0.030303	Pos
HALLMARK_SPERMATOGENESIS_Pos	RBM15B	0.030303	Pos
HALLMARK_SPERMATOGENESIS_Pos	RBMX	0.121212	Pos
HALLMARK_SPERMATOGENESIS_Pos	YTHDF2	0.0606061	Pos
HALLMARK_SPERMATOGENESIS_Pos	YTHDF3	0.030303	Pos
HALLMARK_TGF_BETA_SIGNALING_Pos	FTO	0.121212	Pos
HALLMARK_TGF_BETA_SIGNALING_Pos	IGF2BP3	0.030303	Pos
HALLMARK_TGF_BETA_SIGNALING_Pos	VIRMA	0.030303	Pos
HALLMARK_TGF_BETA_SIGNALING_Pos	YTHDC1	0.030303	Pos
HALLMARK_TGF_BETA_SIGNALING_Pos	YTHDC2	0.0606061	Pos
HALLMARK_TGF_BETA_SIGNALING_Pos	YTHDF3	0.181818	Pos
HALLMARK_TGF_BETA_SIGNALING_Pos	ZC3H13	0.242424	Pos
HALLMARK_UNFOLDED_PROTEIN_RESPONSE_Pos	HNRNPA2B1	0.0606061	Pos
HALLMARK_UNFOLDED_PROTEIN_RESPONSE_Pos	HNRNPC	0.030303	Pos
HALLMARK_UNFOLDED_PROTEIN_RESPONSE_Pos	IGF2BP1	0.030303	Pos
HALLMARK_UNFOLDED_PROTEIN_RESPONSE_Pos	IGF2BP3	0.0606061	Pos
HALLMARK_UNFOLDED_PROTEIN_RESPONSE_Pos	METTL14	0.030303	Pos
HALLMARK_UNFOLDED_PROTEIN_RESPONSE_Pos	RBMX	0.030303	Pos
HALLMARK_UNFOLDED_PROTEIN_RESPONSE_Pos	VIRMA	0.121212	Pos
HALLMARK_UNFOLDED_PROTEIN_RESPONSE_Pos	YTHDC1	0.030303	Pos
HALLMARK_UNFOLDED_PROTEIN_RESPONSE_Pos	YTHDC2	0.121212	Pos
HALLMARK_UNFOLDED_PROTEIN_RESPONSE_Pos	YTHDF2	0.0606061	Pos
HALLMARK_UNFOLDED_PROTEIN_RESPONSE_Pos	YTHDF3	0.0909091	Pos
HALLMARK_UNFOLDED_PROTEIN_RESPONSE_Pos	ZC3H13	0.0606061	Pos
HALLMARK_UV_RESPONSE_DN_Pos	FTO	0.242424	Pos
HALLMARK_UV_RESPONSE_DN_Pos	VIRMA	0.0606061	Pos
HALLMARK_UV_RESPONSE_DN_Pos	YTHDC1	0.030303	Pos
HALLMARK_UV_RESPONSE_DN_Pos	YTHDC2	0.030303	Pos
HALLMARK_UV_RESPONSE_DN_Pos	YTHDF3	0.0909091	Pos
HALLMARK_UV_RESPONSE_DN_Pos	ZC3H13	0.454545	Pos
HALLMARK_WNT_BETA_CATENIN_SIGNALING_Pos	FTO	0.030303	Pos
HALLMARK_WNT_BETA_CATENIN_SIGNALING_Pos	IGF2BP2	0.0606061	Pos
HALLMARK_WNT_BETA_CATENIN_SIGNALING_Pos	IGF2BP3	0.030303	Pos
HALLMARK_WNT_BETA_CATENIN_SIGNALING_Pos	RBM15B	0.030303	Pos
HALLMARK_WNT_BETA_CATENIN_SIGNALING_Pos	RBMX	0.0606061	Pos
HALLMARK_WNT_BETA_CATENIN_SIGNALING_Pos	YTHDC1	0.0909091	Pos
HALLMARK_WNT_BETA_CATENIN_SIGNALING_Pos	YTHDF3	0.030303	Pos
HALLMARK_WNT_BETA_CATENIN_SIGNALING_Pos	ZC3H13	0.0606061	Pos
HALLMARK_ADIPOGENESIS_Neg	IGF2BP2	0.030303	Neg
HALLMARK_ADIPOGENESIS_Neg	RBM15B	0.030303	Neg
HALLMARK_ADIPOGENESIS_Neg	RBMX	0.0606061	Neg
HALLMARK_ADIPOGENESIS_Neg	VIRMA	0.030303	Neg
HALLMARK_ADIPOGENESIS_Neg	YTHDC1	0.030303	Neg
HALLMARK_ALLOGRAFT_REJECTION_Neg	IGF2BP2	0.030303	Neg
HALLMARK_ALLOGRAFT_REJECTION_Neg	RBMX	0.0606061	Neg
HALLMARK_ANDROGEN_RESPONSE_Neg	ALKBH5	0.030303	Neg
HALLMARK_ANDROGEN_RESPONSE_Neg	RBM15B	0.030303	Neg
HALLMARK_ANGIOGENESIS_Neg	HNRNPA2B1	0.030303	Neg
HALLMARK_ANGIOGENESIS_Neg	HNRNPC	0.030303	Neg
HALLMARK_ANGIOGENESIS_Neg	RBM15	0.0606061	Neg
HALLMARK_ANGIOGENESIS_Neg	RBM15B	0.030303	Neg
HALLMARK_ANGIOGENESIS_Neg	RBMX	0.030303	Neg
HALLMARK_ANGIOGENESIS_Neg	WTAP	0.030303	Neg
HALLMARK_ANGIOGENESIS_Neg	YTHDF2	0.0606061	Neg
HALLMARK_APICAL_JUNCTION_Neg	HNRNPA2B1	0.0909091	Neg
HALLMARK_APICAL_JUNCTION_Neg	HNRNPC	0.212121	Neg
HALLMARK_APICAL_JUNCTION_Neg	METTL14	0.030303	Neg
HALLMARK_APICAL_JUNCTION_Neg	RBM15	0.0606061	Neg
HALLMARK_APICAL_JUNCTION_Neg	RBM15B	0.030303	Neg
HALLMARK_APICAL_JUNCTION_Neg	RBMX	0.181818	Neg
HALLMARK_APICAL_JUNCTION_Neg	YTHDF2	0.0606061	Neg
HALLMARK_APICAL_SURFACE_Neg	HNRNPA2B1	0.030303	Neg
HALLMARK_APICAL_SURFACE_Neg	HNRNPC	0.0606061	Neg
HALLMARK_APICAL_SURFACE_Neg	RBM15	0.0606061	Neg
HALLMARK_APICAL_SURFACE_Neg	RBMX	0.121212	Neg
HALLMARK_APICAL_SURFACE_Neg	YTHDF2	0.0606061	Neg
HALLMARK_APOPTOSIS_Neg	ALKBH5	0.030303	Neg
HALLMARK_APOPTOSIS_Neg	RBM15	0.030303	Neg
HALLMARK_APOPTOSIS_Neg	RBM15B	0.030303	Neg
HALLMARK_APOPTOSIS_Neg	RBMX	0.030303	Neg
HALLMARK_APOPTOSIS_Neg	YTHDF1	0.0606061	Neg
HALLMARK_APOPTOSIS_Neg	YTHDF2	0.030303	Neg
HALLMARK_BILE_ACID_METABOLISM_Neg	HNRNPC	0.030303	Neg
HALLMARK_BILE_ACID_METABOLISM_Neg	IGF2BP2	0.030303	Neg
HALLMARK_BILE_ACID_METABOLISM_Neg	IGF2BP3	0.030303	Neg
HALLMARK_BILE_ACID_METABOLISM_Neg	RBM15	0.030303	Neg
HALLMARK_BILE_ACID_METABOLISM_Neg	RBMX	0.0909091	Neg
HALLMARK_BILE_ACID_METABOLISM_Neg	WTAP	0.030303	Neg
HALLMARK_BILE_ACID_METABOLISM_Neg	YTHDF2	0.030303	Neg
HALLMARK_BILE_ACID_METABOLISM_Neg	YTHDF3	0.030303	Neg
HALLMARK_CHOLESTEROL_HOMEOSTASIS_Neg	HNRNPA2B1	0.030303	Neg
HALLMARK_CHOLESTEROL_HOMEOSTASIS_Neg	RBMX	0.030303	Neg
HALLMARK_CHOLESTEROL_HOMEOSTASIS_Neg	VIRMA	0.030303	Neg
HALLMARK_CHOLESTEROL_HOMEOSTASIS_Neg	YTHDC1	0.030303	Neg
HALLMARK_CHOLESTEROL_HOMEOSTASIS_Neg	YTHDF2	0.030303	Neg
HALLMARK_COAGULATION_Neg	ALKBH5	0.030303	Neg
HALLMARK_COAGULATION_Neg	HNRNPA2B1	0.0606061	Neg
HALLMARK_COAGULATION_Neg	HNRNPC	0.0606061	Neg
HALLMARK_COAGULATION_Neg	METTL3	0.030303	Neg
HALLMARK_COAGULATION_Neg	RBM15	0.0606061	Neg
HALLMARK_COAGULATION_Neg	RBM15B	0.030303	Neg
HALLMARK_COAGULATION_Neg	RBMX	0.181818	Neg
HALLMARK_COAGULATION_Neg	VIRMA	0.030303	Neg
HALLMARK_COAGULATION_Neg	WTAP	0.030303	Neg
HALLMARK_COAGULATION_Neg	YTHDC1	0.030303	Neg
HALLMARK_COAGULATION_Neg	YTHDF2	0.0606061	Neg
HALLMARK_COAGULATION_Neg	YTHDF3	0.030303	Neg
HALLMARK_COMPLEMENT_Neg	RBMX	0.121212	Neg
HALLMARK_COMPLEMENT_Neg	YTHDF1	0.030303	Neg
HALLMARK_COMPLEMENT_Neg	YTHDF2	0.030303	Neg
HALLMARK_DNA_REPAIR_Neg	FTO	0.030303	Neg
HALLMARK_DNA_REPAIR_Neg	YTHDF3	0.030303	Neg
HALLMARK_DNA_REPAIR_Neg	ZC3H13	0.0909091	Neg
HALLMARK_EPITHELIAL_MESENCHYMAL_TRANSITION_Neg	HNRNPA2B1	0.030303	Neg
HALLMARK_EPITHELIAL_MESENCHYMAL_TRANSITION_Neg	HNRNPC	0.030303	Neg
HALLMARK_EPITHELIAL_MESENCHYMAL_TRANSITION_Neg	RBM15	0.0606061	Neg
HALLMARK_EPITHELIAL_MESENCHYMAL_TRANSITION_Neg	RBM15B	0.030303	Neg
HALLMARK_EPITHELIAL_MESENCHYMAL_TRANSITION_Neg	RBMX	0.030303	Neg
HALLMARK_EPITHELIAL_MESENCHYMAL_TRANSITION_Neg	YTHDC1	0.030303	Neg
HALLMARK_EPITHELIAL_MESENCHYMAL_TRANSITION_Neg	YTHDF2	0.0606061	Neg
HALLMARK_ESTROGEN_RESPONSE_EARLY_Neg	HNRNPA2B1	0.0606061	Neg
HALLMARK_ESTROGEN_RESPONSE_EARLY_Neg	HNRNPC	0.0909091	Neg
HALLMARK_ESTROGEN_RESPONSE_EARLY_Neg	RBM15	0.0606061	Neg
HALLMARK_ESTROGEN_RESPONSE_EARLY_Neg	RBM15B	0.030303	Neg
HALLMARK_ESTROGEN_RESPONSE_EARLY_Neg	RBMX	0.121212	Neg
HALLMARK_ESTROGEN_RESPONSE_EARLY_Neg	WTAP	0.030303	Neg
HALLMARK_ESTROGEN_RESPONSE_EARLY_Neg	YTHDC1	0.030303	Neg
HALLMARK_ESTROGEN_RESPONSE_EARLY_Neg	YTHDF2	0.0606061	Neg
HALLMARK_ESTROGEN_RESPONSE_LATE_Neg	METTL3	0.030303	Neg
HALLMARK_ESTROGEN_RESPONSE_LATE_Neg	RBM15	0.030303	Neg
HALLMARK_ESTROGEN_RESPONSE_LATE_Neg	RBMX	0.0909091	Neg
HALLMARK_ESTROGEN_RESPONSE_LATE_Neg	VIRMA	0.030303	Neg
HALLMARK_ESTROGEN_RESPONSE_LATE_Neg	WTAP	0.030303	Neg
HALLMARK_ESTROGEN_RESPONSE_LATE_Neg	YTHDC1	0.030303	Neg
HALLMARK_FATTY_ACID_METABOLISM_Neg	ALKBH5	0.030303	Neg
HALLMARK_FATTY_ACID_METABOLISM_Neg	IGF2BP2	0.0606061	Neg
HALLMARK_FATTY_ACID_METABOLISM_Neg	RBM15B	0.0606061	Neg
HALLMARK_FATTY_ACID_METABOLISM_Neg	VIRMA	0.030303	Neg
HALLMARK_FATTY_ACID_METABOLISM_Neg	YTHDC1	0.030303	Neg
HALLMARK_FATTY_ACID_METABOLISM_Neg	YTHDF3	0.030303	Neg
HALLMARK_GLYCOLYSIS_Neg	METTL3	0.030303	Neg
HALLMARK_GLYCOLYSIS_Neg	VIRMA	0.030303	Neg
HALLMARK_GLYCOLYSIS_Neg	YTHDC1	0.030303	Neg
HALLMARK_HEDGEHOG_SIGNALING_Neg	HNRNPA2B1	0.0606061	Neg
HALLMARK_HEDGEHOG_SIGNALING_Neg	HNRNPC	0.0606061	Neg
HALLMARK_HEDGEHOG_SIGNALING_Neg	RBM15	0.030303	Neg
HALLMARK_HEDGEHOG_SIGNALING_Neg	RBMX	0.030303	Neg
HALLMARK_HEDGEHOG_SIGNALING_Neg	YTHDF2	0.030303	Neg
HALLMARK_HEME_METABOLISM_Neg	HNRNPA2B1	0.0909091	Neg
HALLMARK_HEME_METABOLISM_Neg	RBM15	0.0606061	Neg
HALLMARK_HEME_METABOLISM_Neg	RBMX	0.121212	Neg
HALLMARK_HEME_METABOLISM_Neg	YTHDF2	0.030303	Neg
HALLMARK_HYPOXIA_Neg	RBM15	0.030303	Neg
HALLMARK_HYPOXIA_Neg	RBM15B	0.030303	Neg
HALLMARK_HYPOXIA_Neg	RBMX	0.0606061	Neg
HALLMARK_HYPOXIA_Neg	VIRMA	0.030303	Neg
HALLMARK_HYPOXIA_Neg	YTHDC1	0.030303	Neg
HALLMARK_HYPOXIA_Neg	YTHDF2	0.030303	Neg
HALLMARK_IL2_STAT5_SIGNALING_Neg	HNRNPA2B1	0.030303	Neg
HALLMARK_IL2_STAT5_SIGNALING_Neg	HNRNPC	0.030303	Neg
HALLMARK_IL2_STAT5_SIGNALING_Neg	RBMX	0.121212	Neg
HALLMARK_IL2_STAT5_SIGNALING_Neg	YTHDF1	0.030303	Neg
HALLMARK_IL2_STAT5_SIGNALING_Neg	YTHDF2	0.030303	Neg
HALLMARK_IL6_JAK_STAT3_SIGNALING_Neg	ALKBH5	0.030303	Neg
HALLMARK_IL6_JAK_STAT3_SIGNALING_Neg	HNRNPC	0.030303	Neg
HALLMARK_IL6_JAK_STAT3_SIGNALING_Neg	RBM15B	0.030303	Neg
HALLMARK_IL6_JAK_STAT3_SIGNALING_Neg	RBMX	0.151515	Neg
HALLMARK_IL6_JAK_STAT3_SIGNALING_Neg	YTHDF1	0.030303	Neg
HALLMARK_INFLAMMATORY_RESPONSE_Neg	ALKBH5	0.030303	Neg
HALLMARK_INFLAMMATORY_RESPONSE_Neg	RBMX	0.151515	Neg
HALLMARK_INFLAMMATORY_RESPONSE_Neg	YTHDF2	0.030303	Neg
HALLMARK_INTERFERON_GAMMA_RESPONSE_Neg	RBMX	0.0606061	Neg
HALLMARK_KRAS_SIGNALING_DN_Neg	HNRNPA2B1	0.151515	Neg
HALLMARK_KRAS_SIGNALING_DN_Neg	HNRNPC	0.121212	Neg
HALLMARK_KRAS_SIGNALING_DN_Neg	METTL14	0.0606061	Neg
HALLMARK_KRAS_SIGNALING_DN_Neg	RBM15	0.030303	Neg
HALLMARK_KRAS_SIGNALING_DN_Neg	RBMX	0.121212	Neg
HALLMARK_KRAS_SIGNALING_DN_Neg	VIRMA	0.0606061	Neg
HALLMARK_KRAS_SIGNALING_DN_Neg	WTAP	0.030303	Neg
HALLMARK_KRAS_SIGNALING_DN_Neg	YTHDC1	0.030303	Neg
HALLMARK_KRAS_SIGNALING_DN_Neg	YTHDC2	0.0606061	Neg
HALLMARK_KRAS_SIGNALING_DN_Neg	YTHDF2	0.030303	Neg
HALLMARK_KRAS_SIGNALING_DN_Neg	YTHDF3	0.030303	Neg
HALLMARK_KRAS_SIGNALING_DN_Neg	ZC3H13	0.030303	Neg
HALLMARK_KRAS_SIGNALING_UP_Neg	HNRNPC	0.030303	Neg
HALLMARK_KRAS_SIGNALING_UP_Neg	RBMX	0.0909091	Neg
HALLMARK_KRAS_SIGNALING_UP_Neg	YTHDF1	0.030303	Neg
HALLMARK_KRAS_SIGNALING_UP_Neg	YTHDF2	0.030303	Neg
HALLMARK_MTORC1_SIGNALING_Neg	ALKBH5	0.030303	Neg
HALLMARK_MTORC1_SIGNALING_Neg	RBM15B	0.030303	Neg
HALLMARK_MYC_TARGETS_V1_Neg	ALKBH5	0.030303	Neg
HALLMARK_MYC_TARGETS_V2_Neg	FTO	0.030303	Neg
HALLMARK_MYOGENESIS_Neg	HNRNPA2B1	0.0606061	Neg
HALLMARK_MYOGENESIS_Neg	HNRNPC	0.181818	Neg
HALLMARK_MYOGENESIS_Neg	METTL14	0.030303	Neg
HALLMARK_MYOGENESIS_Neg	RBM15	0.0606061	Neg
HALLMARK_MYOGENESIS_Neg	RBM15B	0.030303	Neg
HALLMARK_MYOGENESIS_Neg	RBMX	0.242424	Neg
HALLMARK_MYOGENESIS_Neg	VIRMA	0.030303	Neg
HALLMARK_MYOGENESIS_Neg	WTAP	0.030303	Neg
HALLMARK_MYOGENESIS_Neg	YTHDC1	0.030303	Neg
HALLMARK_MYOGENESIS_Neg	YTHDF2	0.0606061	Neg
HALLMARK_MYOGENESIS_Neg	YTHDF3	0.030303	Neg
HALLMARK_MYOGENESIS_Neg	ZC3H13	0.030303	Neg
HALLMARK_NOTCH_SIGNALING_Neg	HNRNPA2B1	0.030303	Neg
HALLMARK_NOTCH_SIGNALING_Neg	RBM15	0.0606061	Neg
HALLMARK_NOTCH_SIGNALING_Neg	RBMX	0.0909091	Neg
HALLMARK_NOTCH_SIGNALING_Neg	VIRMA	0.030303	Neg
HALLMARK_NOTCH_SIGNALING_Neg	YTHDC1	0.030303	Neg
HALLMARK_NOTCH_SIGNALING_Neg	YTHDF2	0.0606061	Neg
HALLMARK_NOTCH_SIGNALING_Neg	YTHDF3	0.030303	Neg
HALLMARK_OXIDATIVE_PHOSPHORYLATION_Neg	ALKBH5	0.030303	Neg
HALLMARK_OXIDATIVE_PHOSPHORYLATION_Neg	FTO	0.030303	Neg
HALLMARK_OXIDATIVE_PHOSPHORYLATION_Neg	IGF2BP2	0.0606061	Neg
HALLMARK_OXIDATIVE_PHOSPHORYLATION_Neg	RBM15B	0.030303	Neg
HALLMARK_P53_PATHWAY_Neg	HNRNPA2B1	0.030303	Neg
HALLMARK_P53_PATHWAY_Neg	METTL14	0.030303	Neg
HALLMARK_P53_PATHWAY_Neg	RBM15	0.030303	Neg
HALLMARK_P53_PATHWAY_Neg	RBMX	0.0606061	Neg
HALLMARK_P53_PATHWAY_Neg	VIRMA	0.030303	Neg
HALLMARK_P53_PATHWAY_Neg	YTHDC1	0.030303	Neg
HALLMARK_P53_PATHWAY_Neg	YTHDF2	0.030303	Neg
HALLMARK_P53_PATHWAY_Neg	YTHDF3	0.030303	Neg
HALLMARK_PANCREAS_BETA_CELLS_Neg	HNRNPC	0.030303	Neg
HALLMARK_PANCREAS_BETA_CELLS_Neg	IGF2BP1	0.030303	Neg
HALLMARK_PANCREAS_BETA_CELLS_Neg	RBM15	0.030303	Neg
HALLMARK_PANCREAS_BETA_CELLS_Neg	YTHDF2	0.030303	Neg
HALLMARK_PEROXISOME_Neg	ALKBH5	0.030303	Neg
HALLMARK_PEROXISOME_Neg	RBM15	0.030303	Neg
HALLMARK_PEROXISOME_Neg	RBM15B	0.030303	Neg
HALLMARK_PEROXISOME_Neg	YTHDF2	0.030303	Neg
HALLMARK_PI3K_AKT_MTOR_SIGNALING_Neg	ALKBH5	0.030303	Neg
HALLMARK_PI3K_AKT_MTOR_SIGNALING_Neg	RBM15B	0.030303	Neg
HALLMARK_PROTEIN_SECRETION_Neg	ALKBH5	0.030303	Neg
HALLMARK_PROTEIN_SECRETION_Neg	RBM15	0.030303	Neg
HALLMARK_PROTEIN_SECRETION_Neg	RBM15B	0.030303	Neg
HALLMARK_REACTIVE_OXIGEN_SPECIES_PATHWAY_Neg	METTL3	0.0606061	Neg
HALLMARK_REACTIVE_OXIGEN_SPECIES_PATHWAY_Neg	RBM15B	0.030303	Neg
HALLMARK_REACTIVE_OXIGEN_SPECIES_PATHWAY_Neg	RBMX	0.0606061	Neg
HALLMARK_REACTIVE_OXIGEN_SPECIES_PATHWAY_Neg	YTHDC1	0.030303	Neg
HALLMARK_SPERMATOGENESIS_Neg	METTL14	0.030303	Neg
HALLMARK_TGF_BETA_SIGNALING_Neg	RBM15	0.030303	Neg
HALLMARK_TGF_BETA_SIGNALING_Neg	RBMX	0.030303	Neg
HALLMARK_TGF_BETA_SIGNALING_Neg	YTHDF2	0.030303	Neg
HALLMARK_TNFA_SIGNALING_VIA_NFKB_Neg	RBM15	0.030303	Neg
HALLMARK_TNFA_SIGNALING_VIA_NFKB_Neg	RBM15B	0.030303	Neg
HALLMARK_TNFA_SIGNALING_VIA_NFKB_Neg	RBMX	0.0909091	Neg
HALLMARK_TNFA_SIGNALING_VIA_NFKB_Neg	YTHDF2	0.030303	Neg
HALLMARK_UNFOLDED_PROTEIN_RESPONSE_Neg	ALKBH5	0.030303	Neg
HALLMARK_UNFOLDED_PROTEIN_RESPONSE_Neg	RBM15B	0.030303	Neg
HALLMARK_UV_RESPONSE_DN_Neg	HNRNPA2B1	0.030303	Neg
HALLMARK_UV_RESPONSE_DN_Neg	HNRNPC	0.0909091	Neg
HALLMARK_UV_RESPONSE_DN_Neg	RBM15	0.0606061	Neg
HALLMARK_UV_RESPONSE_DN_Neg	RBMX	0.030303	Neg
HALLMARK_UV_RESPONSE_DN_Neg	YTHDF2	0.0606061	Neg
HALLMARK_WNT_BETA_CATENIN_SIGNALING_Neg	RBM15	0.030303	Neg
HALLMARK_XENOBIOTIC_METABOLISM_Neg	HNRNPA2B1	0.030303	Neg
HALLMARK_XENOBIOTIC_METABOLISM_Neg	RBM15	0.030303	Neg
HALLMARK_XENOBIOTIC_METABOLISM_Neg	RBMX	0.212121	Neg
HALLMARK_XENOBIOTIC_METABOLISM_Neg	VIRMA	0.030303	Neg
HALLMARK_XENOBIOTIC_METABOLISM_Neg	YTHDC1	0.0606061	Neg
HALLMARK_XENOBIOTIC_METABOLISM_Neg	YTHDF2	0.030303	Neg
HALLMARK_XENOBIOTIC_METABOLISM_Neg	YTHDF3	0.030303	Neg

## Sheet: Table S6
Table S6. Literature curation of the function for m6A regulators.
Genes	Cancer	Cell Lines	Method	Description	Pubmed ID
IGF2BP1		H1299; MM603	siRNA knockdown	Knockdown of IGF2BP1 in both H1299 and MM603 cells reduced cell proliferation and soft agar colony formation	29245011
IGF2BP1	Ovarian Cancer	SK-MEL2, IGROV-1, ES-2	siRNA knockdown	RNAi knockdown of IMP1 (IGF2BP1) completely blocked proliferation of SK-MEL2, IGROV-1, and ES-2 cells	28846937
IGF2BP1	choriocarcinoma	JAR cells	siRNA knockdown	Knockdown of IMP1 (IGF2BP1) expression in JAR cells inhibited cell migration and invasion, but did not affect cellular proliferation and morphology	23911878
IGF2BP1	retinoblastoma	Y79	siRNA knockdown	Cell viability by MTT assay showed reduction in cell proliferation by 30–40 % in siRNA treated Y79 cells compared to untreated Y79 cells. Wound healing assay showed decreased cell migration in the cells treated with siRNA when compared to untreated Y79 cells at 48 h	27799869
IGF2BP1	Hepatocarcinogenesis	HepG2	siRNA knockdown	Similar to transient IGF2BP1 depletion, shRNA-mediated knockdown of IGF2BP1 correlated with reduced cell proliferation. Subcutaneous injection of 4-8 3 105 HepG2 cells transduced with the control shRNA vector (shControl) led to the formation of macroscopic tumors in 10 out of 16 animals. In contrast, only 3 out of 16 animals showed macroscopic tumors when injected with HepG2 cells depleted of IGF…	24395596
IGF2BP1	melanomas	The normal human melanocytes (NHM), The melanoma cell lines 928, 1011 and 1242	siRNA knockdown	Knockdown of CRD-BP (IGF2BP1) inhibits NF-kB activity, induces apoptosis, and suppresses proliferation and anchorage-independent growth of melanoma cells	18454174
IGF2BP1	ovarian cancer	ES-2 cells	CRISPR/Cas9	IGF2BP1 knockdown significantly reduced tumor cell proliferation and spheroid growth under permissive growth conditions	26917013
IGF2BP1	Cutaneous squamous cell carcinoma	SCC-13, Ca3/7	shRNA knockdown	Knockdown of IGF2BP1 by IGF2BP1-specific sh-RNA (sh-IGF2BP1) significantly reduced cell growth and induced apoptosis in human and mouse cSCC cell lines, SCC-13 and Ca3/7, respectively	27856289
IGF2BP1	Ovarian Cancer	miR-708-overexpressing SKOV3, miR-708-overexpressing A2780	siRNA knockdown	siRNA-mediated reduction of IGF2BP1 led to an inhibition of Akt phosphorylation in both cisplatin-resistant and parental ovarian cancer cells.	28685895
IGF2BP1	Ovarian Cancer	miR-708-overexpressing SKOV3, miR-708-overexpressing A2780	overexpression	IGF2BP1 overexpression remarkably enhanced the phosphorylation of Akt in both SKOV3 and A2780 cells stably expressing miR-708. overexpression of IGF2BP1 induced cisplatin resistance, increasing the IC50 value by 10- and 6-fold in miR-708-overexpressing SKOV3 and A2780 cells, respectively.cisplatin-induced apoptosis was counteracted by IGF2BP1 in both miR-708-overexpressing SKOV3 and A2780 cells	28685895
IGF2BP1		RH36 cells treated with TNFα	siRNA knockdown	IGF2BP1 knockdown significantly reduced RH36 cell viability when compared with non-targeting siRNAtransfected cells. Similarly, IGF2BP1 knockdown significantly increased caspase-3/7 activity upon TNFα treatment, compared with untreated cells. Importantly, IGF2BP1 knockdown alone did not affect RH36 cell viability or caspase activity, indicating that reducing IGF2BP1 levels does not cause general …	24704827
YTHDC1		HeLa and 293T cells	siRNA Transfection, RT-PCR, western blotting	YTHDC1 and SRSF3 tend to promote exon inclusion, whereas SRSF10 facilitates exon skipping	26876937
YTHDC1		293T cells	Tandem Affinity Purification and Mass Spectrometry	YTHDC1 probably has a regulatory role in pre-mRNA splicing through association with SR proteins	26876937
YTHDC1		HeLa	immunofluorescence, siRNA transfection	Both YTHDC1 and SRSF3 are functionally grouped together and have a competitive relationship with SRSF10 when associated with nuclear speckles.	26876937
YTHDC1	Type II testicular germ cell tumors	GCT, TCam-2, NCCIT, NT2/D1	qRT-PCR, Western blot	The main enzymes modifying and interpreting the R6mA landscape in GCT cell lines and tissues are METTL3 as writer, ALKBH5 as eraser and YTHDC1, YTHDF1, YTHDF2 as well as HNRNPC as readers.	30903744
YTHDC1	Kaposi's Sarcoma	BCBL1, 293T	RIP–qRT-PCR	Several m6A sites in RTA pre-mRNA crucial for splicing through interactions with YTH domain containing 1 (YTHDC1), an m6A nuclear reader protein, in conjunction with serine/arginine-rich splicing factor 3 (SRSF3) and SRSF10.	28592530
YTHDC1		HeLa, Ishikawa, SK-OV-3, MCF7, and T47D	RT-PCR, Western Blot, Immunocytochemistry, knock-down, overexpression	The altered YT521 (YTHDC1) alternative splicing is functionally coupled with nonsense-mediated decay and can be interpreted as regulated unproductive splicing and transcription with consecutive impact on the processing of specific cancer-associated genes, such as BRCA2 and PGR.	23765422
IGF2BP2		Hep3b, HeLa, RD, HCC-1359, MB-231, SNU-423	CRISPR/Cas9	Each of the lines lacking IMP2 (IGF2BP2) expression showed a substantial (52–78%) reduction in the rate of proliferation	28753127
IGF2BP2	colorectal cancer	SW480	shRNA knockdown	Cell viability assays revealed that IGF2BP2 knockdown significantly inhibited the proliferation of SW480 cells	27153315
IGF2BP2	colorectal cancer	SW620	overexpression	Exogenous IGF2BP2 expression enhanced cell cycle progression in SW620 cells.	27153315
IGF2BP2	Acute Myelocytic Leukemia	KG-1a, Kasumi	shRNA knockdown	IGF2BP2 knockdown significantly inhibited the growth of the AML cell lines KG-1a and Kasumi	30513526
IGF2BP2	colon cancer	LoVo cell	shRNA knockdown	The LoVo cell proliferation was increased in the shRNA‐IGF2BP2	30335892
IGF2BP2	non-small cell lung cancer	A549	siRNA knockdown	Depletion of IGF2BP2 with specific small interfering RNA led to inhibition of A549 cell proliferation and invasion	29510198
IGF2BP2	GBM	U87 and U251	overexpression	Imp2 (IGF2BP2) OE (overexpression) cells grow significantly faster than vector control cells	25719943
IGF2BP2	GBM	U87 and U251	shRNA knockdown	IGF2BP2 knockdown show delayed growth compared with the scramble shRNA transfected control cells	25719943
IGF2BP2	Embryonic Rhabdomyosarcoma	ERMS	shRNA knockdown	Knockdown of IGF2BP2 in ERMS cells inhibited cell growth and led to cell death	23536553
IGF2BP3	thyroid cancer	PaCa-2	siRNA knockdown	IGF2BP3 knockdown in PaCa-2 cells resulted in decreased cell migration	28193878
IGF2BP3	thyroid cancer	FTC133, HEK293, U2OS	overexpression	Overexpression of IGF2BP3 resulted in a significant increase in proliferation in all three cell lines	28193878
IGF2BP3	gastric carcinogenesis	MKN28, SGC-7901	siRNA knockdown	Silencing IGF2BP3 slowed down the rate of cell growth. Monolayer colony formation ability was inhibited after IGF2BP3 knockdown compared with scramble control. Besides, cell invasive ability was markedly suppressed by siIGF2BP3 transfection.	28399871
IGF2BP3	B cell acute lymphoblastic leukemia (B-ALL)	697 (E2A-PBX translocated), RS4;11, REH (ETV-RUNX1 translocated), NALM6	siRNA knockdown	Propidium iodide staining showed an increase in the apoptotic sub-G1 fraction, and 3-(4,5-dimethylthiazol-2-yl)-5-(3-carboxymethoxyphenyl)-2-(4-sulfophenyl)-2H-tetrazolium (MTS) assay showed a significant reduction in cell proliferation with IGF2BP3 knockdown, confirming the dependence of B-ALL cell lines on IGF2BP3 for survival	26974154
IGF2BP3	B cell acute lymphoblastic leukemia (B-ALL)	RS4;11	CRISPR-Cas9	Cr2-mediated deletion resulted in reduced cell proliferation by MTS assay, increased sub-G1 staining, and increased annexin V positivity	26974154
IGF2BP3	lung cancer	A549, HCT116	shRNA knockdown	knockdown of IGF2BP3 in lung cancer cells suppresses cell proliferation, migration and invasion.	29212181
IGF2BP3	lung cancer	H460	overexpression	Overexpression of IGF2BP3 promotes the cell proliferation of H460 cells as well	29212181
IGF2BP3	pancreatic cancer	S2-013	siRNA knockdown	Suppression of IGF2BP3 expression in S2-013 cells did not affect cell growth in an in vitro MTT assay (data not shown), but it did inhibit cell motility into a wounded area of confluent cultures. In trans-well motility assays, motility of S2-013 cells was significantly lower in IGF2BP3-knockdown cells than in control cells.	25216519
IGF2BP3	colorectal cancer	HCT116, LoVo cells	shRNA knockdown	IGF2BP3 knockdown inhibited the proliferation ability of CRC cells in vitro by inducing. cell‐cycle arrest IGF2BP3 knockdown impaired migration ability of CRC cells in vitro.	30895618
IGF2BP3	colorectal cancer	SW480	overexpression	IFG2BP3 overexpression significantly promoted the cell migration ability compared with the control cells by Transwell assay.	30895618
IGF2BP3	non-small cell lung cancer	H1299, A549	siRNA knockdown	CK-8 assay revealed that knockdown of IGF2BP3 inhibited proliferation of both H1299 and A549 cells. The transwell assay showed that migration ability of H1299 and A549 cells was inhibited by siRNA-mediated knockdown of IGF2BP3	28381175
IGF2BP3	non-small cell lung cancer	H1975	overexpression	CCK-8 assay showed that overexpression (OE) of IGF2BP3 promoted H1975 cells proliferation compared with empty vector (EV) group. The migration and invasion assays showed that motility of H1975 cells was significantly increased by enforced overexpression of IGF2BP3.	28381175
IGF2BP3	Invasive Cancer	HeLa	siRNA knockdown	Transfection of siIMP3 (siIGF2BP3) caused a marked reduction in HeLa cell migration in comparison with control siRNA	21997684
IGF2BP3	ovarian cancer	BG-1, OVCAR3	shRNA knockdown	Knockdown of IMP3 and Lin28B decreased cell proliferation, migration and invasion in BG-1 and OVCAR3 ovarian cancer cells	26158423
IGF2BP3	cutaneous squamous cell carcinoma and keratoacanthoma	HSC-1, HSC-5, HaCaT	siRNA knockdown	The number of cells that migrated from the inside to the outside of the chamber was significantly decreased in siIMP3-transfected HSC-1 cells. The invasion assay using Matrigel-coated Boyden chambers showed that the number of invading cells decreased significantly for siIMP3-transfected HSC-1 and HSC-5 cells. HaCaT cells were not affected by IMP3 knockdown in either the cell migration or invasion…	26782292
YTHDF1	colorectal cancer	SW480, HT29	siRNA knockdown	Knockdown of YTHDF1 resulted in the inhibition of cell proliferation compared with cells transfected as a negative control siRNA in both SW480 and HT29 cells	29484125
YTHDF1	Colorectal Carcinoma	HT29, SW480	shRNA knockdown	YTHDF1 silencing reduced the cell proliferation activity. Additionally, we assessed the effect of YTHDF1 on invasive activity using the Transwell chamber assay and discovered that YTHDF1 silencing reduced the SW480 and HCT116 cell invasive activity	31131257
YTHDC2	colon cancer	HT29, HCT116	shRNA knockdown	The YTHDC2 protein level in Y2KD-29 and -116 cells was reduced to approximately <30% of each control cell line. shRNA-mediated knock down of YTHDC2 inhibits cell motility of human colon tumor cells in vitro	26996300
YTHDC2	Human hepatocellular carcinoma	Huh7	shRNA knockdown	Growth of sh-YD2 cells was slower approximately twice than wild type and sh-control cells. Next, we examined whether sh-YD2 cells have an ability of anchorage-independence growth, indicating that this assay is used as an in vitro criterion of malignant transformation (Guihong et al., 2011). The number of colony of sh-YD2 cells was significantly few as compared to wild type or sh-control cells.	24269672
HNRNPA2B1	breast cancer	MCF-7, MDA-MB-231	shRNA knockdown	Downregulation of hnRNPA2B1 inhibited the proliferation of both the MCF-7 and MDA-MB-231 cell lines	28351333
HNRNPA2B1	pancreatic cancer	Patu-8988, MIA Paca-2, PANC-1	shRNA knockdown, overexpression	G0G1 cell cycle arrest of Patu-8988-KH, Panc-1-KH and MIA Paca-2-KH cells and the S-Phase cell cycle increased of Patu-8988-OH, Panc-1-OH and MIA Paca-2-OH cells, but no significance difference was found in the G2M cell cycle of those cells. So we concluded that HNRNPA2B1 could promote the proliferation of pancreatic cancer cells.	28077929
HNRNPA2B1	lung cancer	DLKP-M	shRNA knockdown	Knockdown of hnRNPA2B1 had an effect on both invasion and migration.	25483567
HNRNPA2B1	pancreatic ductal adenocarcinoma	MPanc-96, HPAF-II, pa-tu-8902, SW-1990, 8988-T, PANC-1	shRNA knockdown	Growth of KRAS dependent cell lines was inhibited by approximately 50% (P < .0001) after HNRNPA2B1 knock down (both shRNA) compared with a control shRNA. In contrast, HNRNPA2B1 depletion failed to produce any significant (P > .05) change in cell growth under these conditions in KRAS-independent cell lines	24998203
HNRNPA2B1	Liver Cancer	Huh7	siRNA knockdown	The EdU staining data showed that knocking down hnRNPA2B1 significantly reduced Huh7 cell proliferation.	28993733
HNRNPA2B1	lung cancer	CL1-5, H1299	siRNA knockdown	Knockdown of Nm23-H1 and hnRNPA2/B1 decreased the cell number and colony-formation number in CL1-5 and H1299 cells, suggesting that both Nm23-H1 and hnRNPA2/B1 increase lung cancer cell proliferation. Nm23-H1 and hnRNPA2/B1 regulates Sp1 expression together to affect cell growth and the EMT during lung cancer progression.	28831131
HNRNPA2B1	lung cancer	CL1-5	overexpression	Overexpression of myc-hnRNPA2/B1 decreased the migratory activity of lung cancer cells	28831131
HNRNPA2B1	cervical cancer	HeLa, CaSki	shRNA knockdown	Inhibition of migration and invasion in HeLa and CaSki cells after hnRNP A2/B1 knockdown	29328485
YTHDF2	pancreatic cancer	SW1990, BxPC3	shRNA knockdown	YTHDF2 knockdown inhibits the ability of proliferation via Akt/GSK3β/CyclinD1 pathway in pancreatic cancer cells. YTHDF2 knockdown promotes the migration ability of pancreatic cancer cells. YTHDF2 knockdown promotes the invasion and adhesion ability in pancreatic cancer cells.	29135329
YTHDF2		HeLa	siRNA knockdown	After 72 hours of YTHDF2 knockdown, the viability of HeLa cells reduced by 50% (Extended Data Fig. 8e–f), indicating that the YTHDF2-mediated RNA processing could have biological significance.	24284625
YTHDF2	hepatocellular carcinoma	HepG2	siRNA knockdown	YTHDF2 siRNA was able to block the anti-miR-145-enhanced proliferation, suggesting that miR-145 suppresses the proliferation of HCC cells through modulating YTHDF2.	28104805
YTHDF2	gastric cancer cells	MGC-803	shRNA knockdown	Knockdown of YTHDF2 in MGC-803 cells inhibits cell proliferation and promotes apoptosis.	29382422
YTHDF2	hepatocellular carcinoma	DU-145, PC3	siRNA knockdown	Knock-down of YTHDF2 significantly upregulates global mRNA m6A levels to suppress PCa cell proliferation and migration	29423080
YTHDF2	Acute Myeloid Leukemia	THP-1	shRNA knockdown	YTHDF2 knockdown inhibited their proliferative capacity (Figure 2G) and increased their apoptosis but had no impact on their myeloid differentiation.	31031138
YTHDF2	hepatocellular carcinoma	HEP3B, SMMC7721, QGY7703, BEL7402	overexpression	Overexpression of YTHDF2 suppresses HCC cell proliferation and growth in vitro and in vivo	30423408
YTHDF2		KiSLK, BCBL1-R	knockdown	An increase in the half-life of viral transcripts after YTHDF2 knockdown, which is consistent with the reported role of YTHDF2 in promoting mRNA degradation.	30185592
HNRNPC	breast cancer	MCF7, T47D	siRNA knockdown	Repression of HNRNPC arrested the proliferation and tumorigenesis of MCF7 and T47D	30158112
HNRNPC	Glioblastoma	T98G	siRNA knockdown	Silencing of hnRNPC inhibits proliferation of T98G cells and enhances etoposide-induced apoptosis.	22907752
HNRNPC	esophageal squamous cell carcinoma	KYSE150, EC109	shRNA knockdown	Knockdown of efficiently suppressed cell migration and reversed EMT progress	30824187
HNRNPC	brain metastasis	LvBr2	siRNA knockdown	Ooverexpression of miR-146a and the silencing of hnRNPC significantly inhibited the migratory activity in LvBr2 cells	22949171
HNRNPG (RBMX)	endometrial cancer	Ishikawa	shRNA knockdown	HNRNPG as antagonistic regulators of ERa exon7 splicing	25884434
METTL3	breast cancer	MDA-MB-468	siRNA knockdown	METTL3 depletion resulted in the obvious inhibition of cell proliferation and an augmented cell apoptosis population in breast cancer cells.	29174803
METTL3		A549, H1299, H1792, HeLa cells	shRNA knockdown	METTL3 depletion results in strong inhibition of cancer cell growth, increases cell apoptosis, and significantly decreases the invasive ability of cancer cells. Conversely, METTL3 overexpression in human fibroblasts promotes cell invasion. Overall, our data support an important role of METTL3 in controlling cancer cell growth, survival and invasion.	27117702
METTL3		MOLM13, THP1	shRNA knockdown	An independent genetic approach, using human MOLM13 cells harbouring inducible METTL3-specific shRNAs, was used to validate our findings. These cells showed near-complete loss of METTL3 mRNA and protein upon tetracycline induction of shRNAs and markedly reduced proliferation. Similar results were obtained using human AML cell line THP1	29186125
METTL3	glioblastoma stem cell	PBT003, PBT707, PBT017, PBT726, PBT111	shRNA knockdown	KD of METTL3 increased cell growth substantially in all GSC lines tested	28297667
METTL3	Promotes Liver Cancer	Huh-7, HepG2	shRNA knockdown	KNOCKDOWN OF METTL3 INHIBITED HCC GROWTH AND METASTASIS	29171881
METTL3	Promotes Liver Cancer	MHCC97L	CRISPR/dCas9-VP64/ MS2-p65-HSF1	OVEREXPRESSION OF METTL3 PROMOTED HCC PROLIFERATION AND MIGRATION	29171881
METTL3	leukemia	MOLM13, NOMO-1, NB4	shRNA knockdown	METTL3 knockdown significantly decreased m6A levels, blocked cell growth, induced differentiation, and resulted in an increased in apoptosis	28920958
METTL3	glioma stem-like cells	MGG8, GB1	shRNA knockdown	Silencing METTL3 by five different shRNAs resulted in the inhibition of GSC (MGG8 and GB1) growth by neurosphere formation assay and limiting dilution assay. Further, we also found that the proportion of live cells was reduced significantly in METTL3 silenced condition, while there was an increase in the proportion of apoptotic cells as seen by increased Annexin V-positive cells	28991227
METTL3	renal cell carcinoma	CAKI-1, CAKI-2	lentivirus (knockdown and overexpression)	Knockdown of METTL3 could obviously promote cell proliferation, migration and invasion function. In contrast, up-regulation of METTL3 could inhibit such functions and reduce G0/G1 arrest. Additionally, up-regulation of METTL3 significantly suppressed tumor growth in vivo.	29221190
METTL3	Gastric Cancer Cells	AGS, MKN 45	shRNA knockdown	Down-regulation of METTL3 by shRNA transfection significantly inhibits cell proliferation and colony formation by human gastric cancer in vitro.	30886897
METTL14	Hepatocellular Carcinoma	SMMC-7721, Hep3B	siRNA knockdown	METTL14 depletion markedly increased the migration and invasiveness of HCC cells	27774652
METTL14	Hepatocellular Carcinoma	MMC-7721, HepG2, HCC-1664	overexpression	METTL14 overexpression signifi- cantly suppressed the migration and invasiveness of HCC cells in Transwell assay	27774652
METTL14	Glioblastoma Stem Cells	PBT003, PBT707, PBT111, PBT726	shRNA knockdown	Knocking Down METTL14 Expression Enhances the Growth and Self-Renewal of GSCs	28297667
METTL14	acute myeloid leukemia	MM6, NB4	shRNA knockdown	METTL14 depletion inhibits human AML cell survival/growth and promotes myeloid differentiation	29290617
METTL14		MDA-MB-231, MDA-MB-468, BT-549, DU-145, HepG2, HeLa	siRNA knockdown	METTL14 KD (using either siRNA #1 or #2) led to reduced long-term viability, migration, and invasion of breast cancer (MDA-MB-231, MDA-MB-468, and BT-549), prostate cancer (DU-145), liver cancer (HepG2), and cervical cancer (HeLa) cells	30306128
METTL14	endometrial cancer	HEC-1-A	CRISPR-Cas9	METTL14+/– cells exhibited reduced m6A mRNA methylation, and the reductions in m6A methylation are similar to those observed in the tumor samples. heterozygous knockout of METTL14 increased cell proliferation, anchorage-independent growth, colony formation, cell migration, and invasion	30154548
METTL14	breast cancer	MDA-MB-231	overexpression	Reducing m6A expression by overexpressing METTL14 and/or knockdown of ALKBH5 could inhibit breast cell viability, colony formation and cell migration.	30953473
METTL14	gastric cancer	HGC‐27	siRNA knockdown	Proliferation of HGC‐27 cell was enhanced by METTL14 knockdown or repressed by FTO knockdown	31243897
WTAP	cholangiocarcinoma	HuCCT1, SNU1196	siRNA knockdown	Overexpression or knockdown of WTAP significantly increased or decreased the motility of cholangiocarcinoma cells.	23354623
WTAP	cholangiocarcinoma	HuCCT1	overexpression	Overexpression or knockdown of WTAP significantly increased or decreased the motility of cholangiocarcinoma cells.	23354623
WTAP	acute myeloid leukemia	K562, HL-60, OCI-AML3, primary AML cells	shRNA knockdown	WTAP expression silenced in K562 and HL-60 cells, leading to a significant reduction (P ≤ 0.05) in proliferation and clonogenic survival (P ≤ 0.01). Similar effects on proliferation were observed in the AML cell line OCI-AML3 and in primary AML cells	24413322
WTAP	Renal cell carcinoma	Caki-1, ACHN	shRNA knockdown	CCK8 assay indicated that cell proliferation was inhibited by WTAP knockdown. In colony formation assays, knockdown of WTAP could significantly decrease cell colony formation efficiency. cell cycle analysis used by flow cytometry demonstrated an increased percentage of G1 phase in WTAP knockdown cells.	29482572
WTAP	Renal cell carcinoma	Caki-1, ACHN	overexpression	Enhanced cell growth occurred after WTAP overexpression compared with the NC group. the colony formation rate was increased in WTAP up-regulated cells.	29482572
WTAP	diffuse large B-cell lymphoma	OCI-Ly19	shRNA knockdown, overexpression	TAP positively influenced cell proliferation, as the proliferation of OCI-Ly19 cells, which were infected with WTAP overexpressed lentivirus, was higher than the control group. On the reverse, when WTAP had been knocked-down, the proliferation of OCI-Ly10 cells was inhibited	30143009
WTAP	pancreatic cancer	MIA PaCa-2, BxPC-3	shRNA knockdown, overexpression	Cell migration and invasion was increased by WTAP overexpression and suppressed by WTAP knockdown in both MIA PaCa-2 and BxPC-3 cells.	30851419
WTAP	glioblastoma	U87MG, GBM05	siRNA knockdown, overexpression	Knockdown by siRNA or overexpression by cDNA regulated migration and invasion of cancer cells.	22957919
KIAA1429 (VIRMA)	breast cancer	MCF-7, SUM1315	shRNA knockdown	KIAA1429 knockdown led to significant decreased cell proliferation in MCF-7 and SUM1315 cells	31285549
KIAA1429 (VIRMA)	breast cancer	MCF-7, MDAMB-231	overexpression	N-KIAA1429 overexpression led to significantly increased cell proliferation in MCF-7 and MDAMB-231 cells	31285549
KIAA1429 (VIRMA)	hepatocellular carcinoma	HepG2	siRNA knockdown	KIAA1429 promotes cell proliferation in HCC. KIAA1429 increases cell migration and invasion in HCC.	31118692
RBM15	Chronic myelogenous leukemia	K562	shRNA knockdown	Knockdown of RBM15 slows cell growth and induces apoptosis in CML cells	22497198
RBM15B
ZC3H13	colorectal cancer	SW480, HCT116	siRNA knockdown, overexpression	ZC3H13 decreased CRC cells proliferation and invasion.	30311220
FTO	Gastric cancer	MKN45	siRNA knockdown	Knockdown of FTO expression inhibits GC cell viability, proliferation, migration and invasion	28849183
FTO	Gastric cancer	AGS	overexpression	Overexpression of FTO promotes cell viability, proliferation, migration and invasion in vitro	28849183
FTO	acute myeloid leukemia	MONOMAC-6, MV4-11	shRNA knockdown, overexpression	FTO promotes cell proliferation/transformation and suppresses apoptosis in vitro	28017614
FTO	lung cancer cells	A549, LC-AI, HCIeH522	shRNA knockdown	FTO knockdown significantly repressed the in vitro proliferation of human lung cancer cells	30905413
FTO	lung squamous cell carcinoma	L78, NCI-H520	shRNA knockdown	FTO knockdown effectively inhibited cell proliferation and invasion, while promoted cell apoptosis of L78 and NCI-H520 cells.	29842885
FTO	Intrahepatic Cholangiocarcinoma	TFK1, HCCC-9810	shRNA knockdown	FTO Promotes Cisplatin -Induced Apoptosis and Inhibits the Migration of ICC Cells in vitro	31143705
FTO	Intrahepatic Cholangiocarcinoma	TFK1	overexpression	Overexpression of FTO suppressed the growth, volume and weight of the tumors	31143705
ALKBH5	breast cancer stem cell	MDA-MB-231	Orthotopic Transplantation (shRNA knockdown)	Knockdown of ALKBH5 Impairs Tumor Formation and Decreases BCSCs in Vivo	27001847
ALKBH5	Glioblastoma Stem-Like Cells	GSC11, GSC17, GSC23	shRNA knockdown	ALKBH5 Inhibition Decreases the Proliferation and Tumorigenesis of GSCs	28344040
ALKBH5	epithelial ovarian cancer	SKOV3, A2780	siRNA knockdown	Silencing of ALKBH5 in SKOV3 cells enhanced the autophagy and inhibited the proliferation and invasion in vitro and in vivo, whereas the ectopic expression of ALKBH5 in A2780 cells exerted an opposite effect.	30987661
ALKBH5	gastric cancer	SGC-7901, BGC-823	siRNA knockdown	Reductions in ALKBH5 expression significantly inhibited the invasion and metastasis of GC cells	31290116
ALKBH5	breast cancer	MDA-MB-231	siRNA knockdown	Knockdown of ALKBH5 could inhibit breast cell viability, colony formation and cell migration.	30953473
ALKBH5	breast cancer	HMEC Primary cell lines	shRNA knockdown	Increasing m6A levels by simultaneous overexpression of the m6A methyltransferases METTL3 and 14 or by knockdown of the demethylase ALKBH5 (Figure ​(Figure4A)4A) in normoxic conditions also led to an increase in migration of the transformed cells, further supporting a role for increased m6A in this phenotypic change.	30131850
